# Supplementary material for: A Pilot Study on the Effects of l-Carnitine and Trimethylamine-N-Oxide on Platelet Mitochondrial DNA Methylation and CVD Biomarkers in Aged Women
Source: MDPI journal article supplement (doi:10.3390/ijms21031047), 2020-02-05
Supplement: s1 [file s1]

Supplementary Materials

| Descriptive statistics |                            |               |       |       |        |        |        |
|------------------------|----------------------------|---------------|-------|-------|--------|--------|--------|
| Time                   | treatment                  |               | N     | Min   | Max    | Mean   | SD     |
| Before                 | control                    | TMAO (ng/mL)  | 9     | 225.3 | 484.0  | 357.7  | 91.3   |
|                        |                            | TC (mg/dL)    | 9     | 157.0 | 278.0  | 208.4  | 48.3   |
|                        |                            | HDL-c (mg/dL) | 9     | 45.0  | 144.0  | 71.7   | 29.7   |
|                        |                            | LDL-c (mg/dL) | 9     | 77.0  | 187.0  | 113.4  | 41.2   |
|                        |                            | TG (mg/dL)    | 9     | 58.0  | 241.0  | 117.7  | 60.3   |
|                        |                            | TC/HDL-c      | 9     | 1.9   | 4.7    | 3.1    | 0.9    |
|                        |                            | TG/HDL-c      | 9     | 0.8   | 5.4    | 2.0    | 1.5    |
|                        | L-leucine +<br>L-carnitine | TMAO (ng/mL)  | 9     | 118.9 | 535.6  | 344.3  | 129.8  |
|                        |                            | TC (mg/dL)    | 9     | 132.0 | 296.0  | 209.0  | 44.4   |
|                        |                            | HDL-c (mg/dL) | 9     | 49.0  | 101.0  | 70.7   | 15.9   |
|                        |                            | LDL-c (mg/dL) | 9     | 67.0  | 199.0  | 118.7  | 38.6   |
|                        |                            | TG (mg/dL)    | 9     | 61.0  | 143.0  | 100.0  | 31.5   |
|                        |                            | TC/HDL-c      | 9     | 2.1   | 4.0    | 3.0    | 0.7    |
|                        |                            | TG/HDL-c      | 9     | 0.6   | 2.4    | 1.5    | 0.6    |
|                        | L-leucine                  | TMAO (ng/mL)  | 12    | 74.2  | 523.8  | 293.2  | 141.1  |
|                        |                            | TC (mg/dL)    | 12    | 163.0 | 240.0  | 204.2  | 25.8   |
|                        |                            | HDL-c (mg/dL) | 12    | 44.0  | 101.0  | 66.8   | 19.5   |
|                        |                            | LDL-c (mg/dL) | 12    | 71.0  | 156.0  | 114.3  | 24.5   |
|                        |                            | TG (mg/dL)    | 12    | 45.0  | 246.0  | 115.4  | 53.1   |
|                        |                            | TC/HDL-c      | 12    | 1.9   | 4.2    | 3.3    | 0.8    |
|                        |                            | TG/HDL-c      | 12    | 0.5   | 4.9    | 1.9    | 1.2    |
| After                  | control                    | TMAO (ng/mL)  | 9     | 178.7 | 426.6  | 287.2  | 88.2   |
|                        |                            | TC (mg/dL)    | 9     | 154.0 | 294.0  | 211.0  | 53.5   |
|                        |                            | HDL-c (mg/dL) | 9     | 42.0  | 131.0  | 69.1   | 26.5   |
|                        |                            | LDL-c (mg/dL) | 9     | 83.0  | 189.0  | 117.7  | 35.8   |
|                        |                            | TG (mg/dL)    | 9     | 78.0  | 177.0  | 121.4  | 29.4   |
|                        |                            | TC/HDL-c      | 9     | 2.2   | 4.0    | 3.2    | 0.6    |
|                        |                            | TG/HDL-c      | 9     | 0.9   | 3.1    | 2.0    | 0.8    |
|                        | L-leucine +<br>L-carnitine | TMAO (ng/mL)  | 9     | 238.1 | 5124.5 | 2216.8 | 1869.0 |
|                        |                            | TC (mg/dL)    | 9     | 192.0 | 253.0  | 225.0  | 19.7   |
|                        |                            | HDL-c (mg/dL) | 9     | 47.0  | 101.0  | 70.8   | 16.1   |
|                        |                            | LDL-c (mg/dL) | 9     | 97.0  | 168.0  | 134.7  | 24.9   |
|                        |                            | TG (mg/dL)    | 9     | 69.0  | 164.0  | 98.6   | 36.9   |
|                        |                            | TC/HDL-c      | 9     | 2.1   | 5.0    | 3.4    | 0.9    |
|                        |                            | TG/HDL-c      | 9     | 0.7   | 3.5    | 1.6    | 1.0    |
| L-leucine              | TMAO (ng/mL)               | 12            | 124.3 | 512.7 | 237.4  | 103.9  |        |
|                        | TC (mg/dL)                 | 12            | 151.0 | 251.0 | 210.3  | 30.7   |        |

|  |  |               |    |      |       |       |      |
|--|--|---------------|----|------|-------|-------|------|
|  |  | HDL-c (mg/dL) | 12 | 47.0 | 107.0 | 72.6  | 18.9 |
|  |  | LDL-c (mg/dL) | 12 | 76.0 | 148.0 | 116.0 | 21.2 |
|  |  | TG (mg/dL)    | 12 | 54.0 | 200.0 | 109.6 | 43.6 |
|  |  | TC/HDL-c      | 12 | 2.1  | 4.6   | 3.0   | 0.7  |
|  |  | TG/HDL-c      | 12 | 0.6  | 4.3   | 1.7   | 1.1  |

**Supplementary Table 1.** Descriptive statistics of TMAO and blood lipids in the population divided per groups and time of intervention.

|                  |                          |                                  |                  |
|------------------|--------------------------|----------------------------------|------------------|
| <b>MTCO1</b>     | TATTAATTGGTTTTTAGGGTTTAT | Bio-CAACAAATCATTTTCATAT TACTTC C | TATTTATAGTAGGAAT |
| <b>D-Loop</b>    | GTGTATTGTTTTGAGGAGGTAAGT | Bio-CACTCCCATACTACTAATCTCATCAAT  | TTTTTGGGGTTTGGT  |
| <b>mtpair.21</b> | AATCCAAGCCTACGTTTTTACA   | AGTATGAGGAGCGTTATGGAGT           |                  |
| <b>mtpair.19</b> | AATCGAGTAGTACTCCCGATTG   | TTCTAGGACGATGGGCATGAAA           |                  |
| <b>GAPDH</b>     | CTCTGCTCCTCCTGTTTCGAC    | AATCCGTTGACTCCGACCTT             |                  |
| <b>AR</b>        | TCCAGAATCTGTTCCAGAGCGTGC | GCTGTGAAGGTTGCTGTTTCCTCAT        |                  |

**Supplementary Table 2.** Sequences of primers used for pyrosequencing of mtDNA and contamination test.

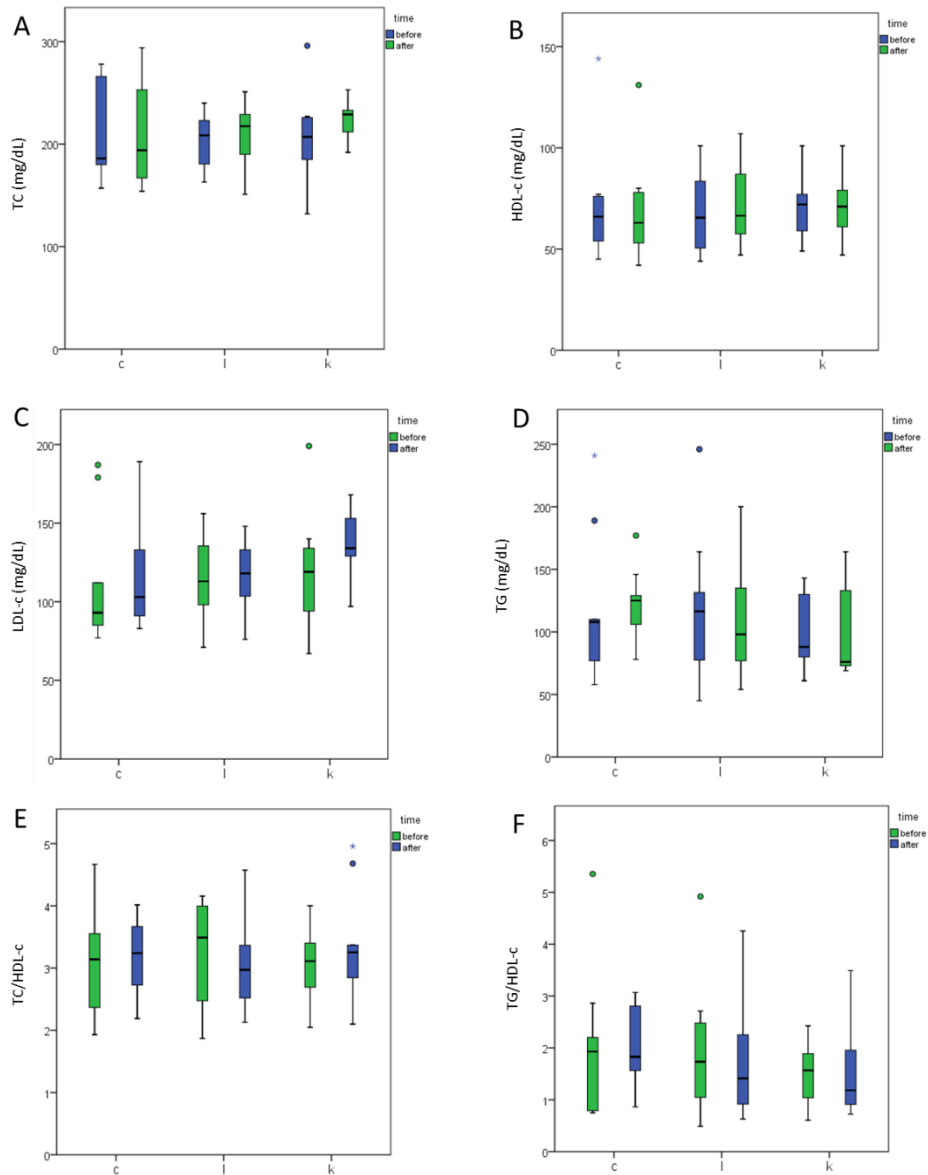

**Supplementary figure 1. Lipid profile in the different intervention groups before and after the interventions.** TC (A), HDL-c (B), LDL-c (C), TG (D), TC/HDL-c ratio (E) and TG/HDL-c ratio (F) before and after each intervention are displayed. c = control group (n=9); l = L-leucine group (n=12); k = L-leucine + L-carnitine group(n=9).

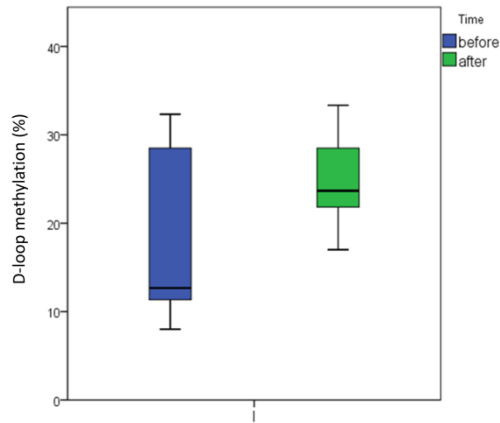

**Supplementary figure 2. D-loop methylation in leucine group (n=7), before and after the treatment.**

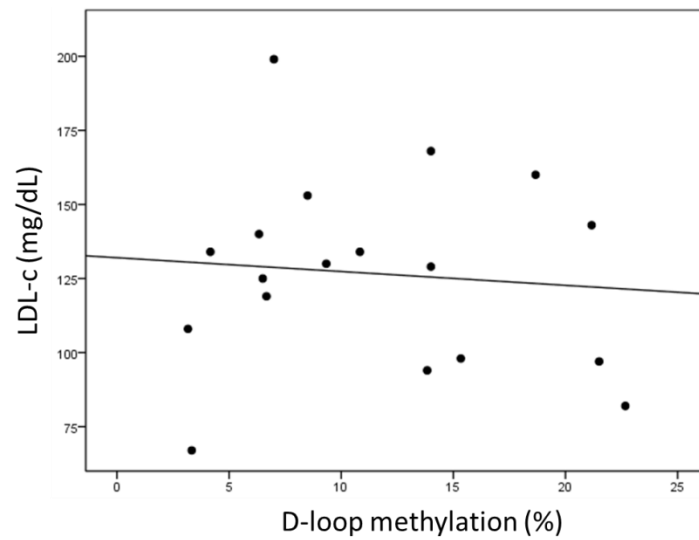

**Supplementary figure 3. Correlations between D-loop methylation and LDL in the L-leucine + L-carnitine group (n=18). No significant association was measured (Pearson coefficient= -0.92; p= 0.717)**

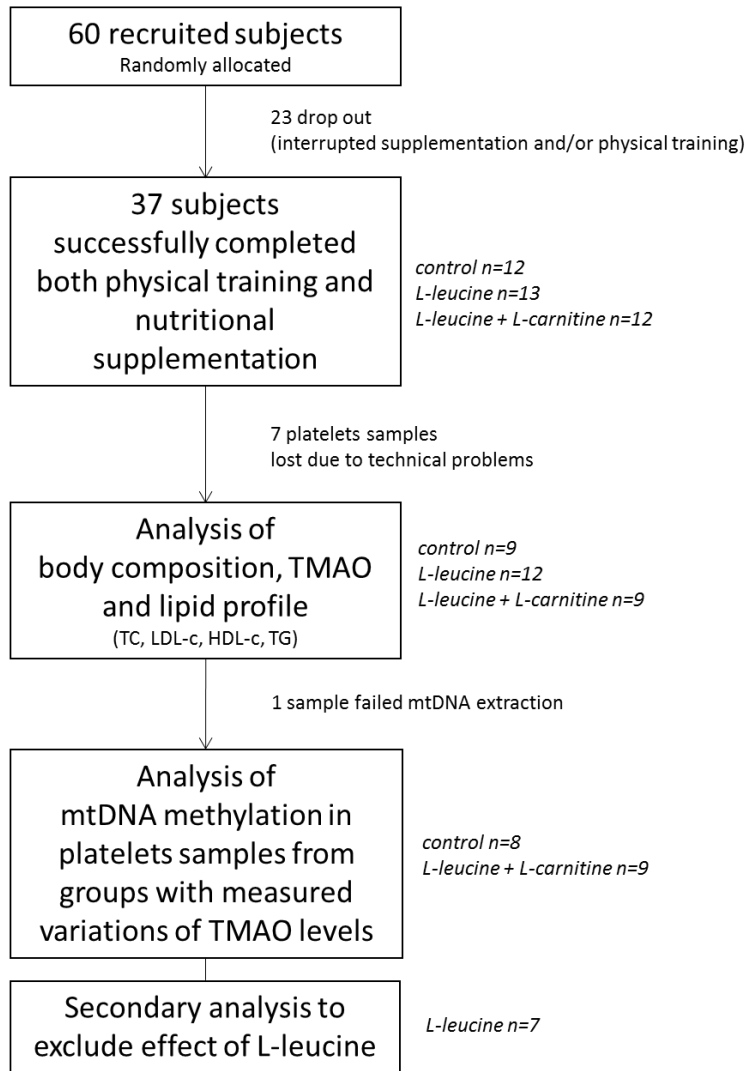

**Supplementary figure 4. Flow-chart of the study.** Graphical representation of the analyzed samples through the study.

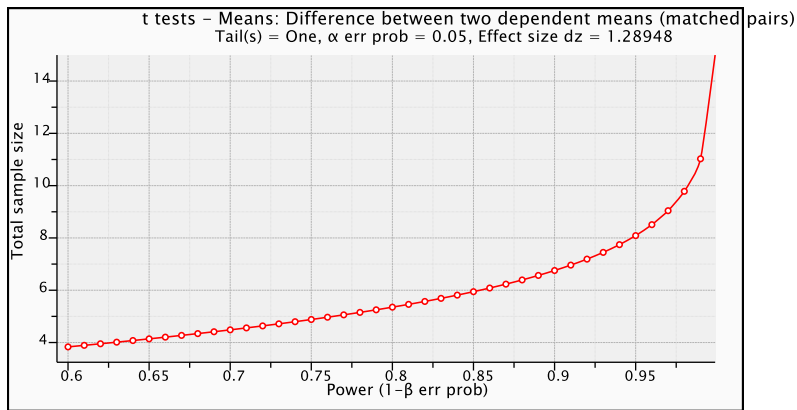

**Supplementary figure 5. Power calculation analysis of D-loop methylation change in the L-leucine + L-carnitine group.** The calculated effect size was 1.289; the actual calculated power was 0.969. When comparing the same group before and after the treatment, a sample size of 7 can guarantee a power of 0.9.
